# Supplementary material for: Magnetic circular dichroism studies of iron(ii) binding to human calprotectin
Source: Royal Society of Chemistry journal article supplement (doi:10.1039/c6sc03487j), 2016-10-11
Supplement: c6sc03487j1.pdf [file c6sc03487j1.pdf]

*Supporting Information for*

**Magnetic Circular Dichroism Studies of Iron(II) Binding to Human  
Calprotectin**

Tessa M. Baker<sup>a</sup>, Toshiki G. Nakashige<sup>b</sup>, Elizabeth M. Nolan<sup>\*,b</sup>, and Michael L. Neidig<sup>\*,a</sup>

<sup>a</sup> Department of Chemistry, University of Rochester, Rochester, New York 14627, United States

<sup>b</sup> Department of Chemistry, Massachusetts Institute of Technology, Cambridge, Massachusetts 02139, United States

**Table of Contents**

|                                     |    |
|-------------------------------------|----|
| 1. Supplementary Data . . . . .     | S2 |
| 1.1 Sample Concentrations . . . . . | S2 |
| 1.2 MCD Spectra . . . . .           | S3 |

## 1. Supplementary Data

### 1.1 Sample Concentrations

**Table S1.** Protein and Metal Concentrations of MCD Samples

| <b>Protein</b>                      | <b>[Protein] (mM)</b> | <b>[Fe(II)] (mM)</b> | <b>[Ca(II)] (mM)</b> | <b>Glassing agent<sup>a</sup></b> |
|-------------------------------------|-----------------------|----------------------|----------------------|-----------------------------------|
| CP-Ser                              | 1.36                  | 1.22                 | 27.2                 | Glycerol                          |
| CP-Ser                              | 1.68                  | 1.51                 | 33.6                 | Sucrose                           |
| H103A                               | 1.44                  | 1.30                 | 28.8                 | Glycerol                          |
| H103A                               | 1.84                  | 1.66                 | 36.8                 | Sucrose                           |
| AHA                                 | 1.81                  | 1.63                 | 36.2                 | Glycerol                          |
| AHA                                 | 1.74                  | 1.57                 | 34.8                 | Sucrose                           |
| AAA                                 | 1.36                  | 1.22                 | 27.2                 | Glycerol                          |
| AAA                                 | 2.24                  | 2.01                 | 44.8                 | Sucrose                           |
| $\Delta$ His <sub>3</sub> Asp       | 1.11                  | 1.00                 | 22.2                 | Glycerol                          |
| $\Delta$ His <sub>3</sub> Asp       | 1.54                  | 1.39                 | 30.8                 | Sucrose                           |
| $\Delta$ His <sub>3</sub> Asp-H103A | 1.61                  | 1.45                 | 32.2                 | Sucrose                           |
| CP-Ser                              | 1.68                  | 0.50                 | 33.6                 | Sucrose                           |
| CP-Ser                              | 1.68                  | 1.01                 | 33.6                 | Sucrose                           |
| CP-Ser                              | 1.68                  | 2.02                 | 33.6                 | Sucrose                           |
| $\Delta$ His <sub>4</sub>           | 1.59                  | 1.43                 | 29.8                 | Glycerol                          |
| $\Delta$ His <sub>4</sub>           | 1.58                  | 1.42                 | 31.2                 | Sucrose                           |
| $\Delta$ His <sub>3</sub> Asp       | 2.26                  | 3.39                 | 45.2                 | Sucrose                           |
| CP-Ser                              | 1.85                  | 1.11                 | 0                    | Sucrose                           |
| $\Delta$ His <sub>3</sub> Asp       | 1.42                  | 0.85                 | 0                    | Sucrose                           |

<sup>a</sup> Glycerol samples were prepared with 40% (v/v) 150 HEPES, 200 mM NaCl, pD 7.4 60% (v/v) glycerol-*d*<sub>8</sub> in D<sub>2</sub>O. Sucrose samples were prepared with 150 mM HEPES, 200 mM NaCl, pD 7.4 saturated with sucrose in D<sub>2</sub>O.

## 1.2 MCD Spectra

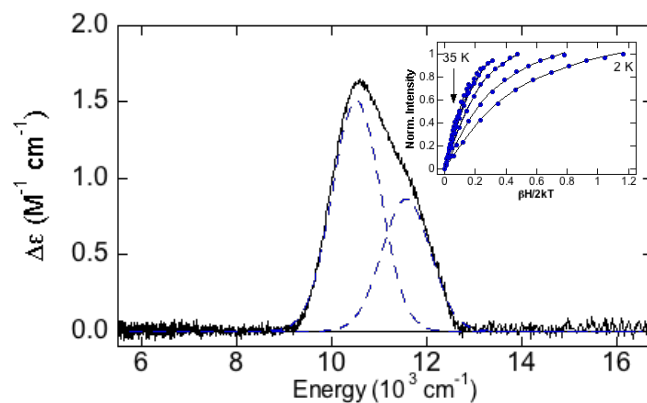

**Figure S1.** 5 K, 7 T NIR MCD spectra of  $\Delta\text{His}_3\text{Asp}/\text{Ca}(\text{II})/\text{Fe}(\text{II})$  in a glycerol glass. Gaussian fits are shown as dashed blue lines. Inset: Saturation magnetization data (dots) and best fit (lines) for  $\Delta\text{His}_3\text{Asp}/\text{Ca}(\text{II})/\text{Fe}(\text{II})$  in glycerol collected at  $10310 \text{cm}^{-1}$ .

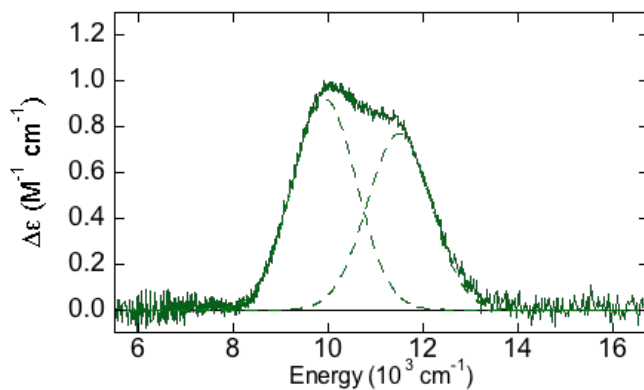

**Figure S2.** 5 K, 7 T NIR MCD spectra of  $\Delta\text{His}_3\text{Asp}(\text{H103A})/\text{Ca}(\text{II})/\text{Fe}(\text{II})$  in a saturated sucrose buffer solution. Gaussian fits are shown as dashed green lines.
